# Supplementary material for: Compound Danshen Dripping Pill inhibits hypercholesterolemia/atherosclerosis-induced heart failure in ApoE and LDLR dual deficient mice via multiple mechanisms
Source: PubMed Central journal article supplement — Acta Pharm Sin B. 2022 Nov 15;13(3):1036–52. doi: 10.1016/j.apsb.2022.11.012 (PMC10031343; doi:10.1016/j.apsb.2022.11.012), 2022-11-15
Supplement: mmc1.pdf [file mmc1.pdf]

Supporting Information for

Original article

**Compound Danshen Dripping Pill inhibits hypercholesterolemia/atherosclerosis-induced heart failure in ApoE and LDLR dual deficient mice *via* multiple mechanisms**

**Yanfang Yang<sup>a,†</sup>, Ke Feng<sup>b,†</sup>, Liying Yuan<sup>a</sup>, Yuxin Liu<sup>a</sup>, Mengying Zhang<sup>c</sup>, Kaimin Guo<sup>c</sup>, Zequn Yin<sup>d</sup>, Wenjia Wang<sup>c</sup>, Shuiping Zhou<sup>e,f</sup>, He Sun<sup>c,e,f</sup>, Kaijing Yan<sup>c,e,f</sup>, Xijun Yan<sup>e,f</sup>, Xuerui Wang<sup>d</sup>, Yajun Duan<sup>d,g,\*</sup>, Yunhui Hu<sup>c,\*</sup>, Jihong Han<sup>a,d,\*</sup>**

<sup>a</sup>*College of Life Sciences, State Key Laboratory of Medicinal Chemical Biology, Key Laboratory of Bioactive Materials of Ministry of Education, Nankai University, Tianjin 300071, China*

<sup>b</sup>*Department of Physiology, Binzhou Medical University, Yantai 264003, China*

<sup>c</sup>*Cloudphar Pharmaceuticals Co., Ltd., Shenzhen 518000, China*

<sup>d</sup>*Key Laboratory of Metabolism and Regulation for Major Diseases of Anhui Higher Education Institutes, Hefei University of Technology, Hefei 230009, China*

<sup>e</sup>*The State Key Laboratory of Core Technology in Innovative Chinese Medicine, Tasly Academy, Tasly Holding Group Co., Ltd., Tianjin 300410, China*

<sup>f</sup>*Tasly Pharmaceutical Group Co., Ltd., Tianjin 300410, China*

<sup>g</sup>*Department of Cardiology, the First Affiliated Hospital of USTC, Division of Life Science and Medicine, University of Science and Technology of China, Hefei 230001, China*

Received 11 August 2022; received in revised form 19 September 2022; accepted 10 October 2022

\*Corresponding authors. Tel.: +86 17352916451(Yajun Duan); +86 18522755110 (Yunhui Hu); +86 13920545670 (Jihong Han).

E-mail addresses: [yduan@hfut.edu.cn](mailto:yduan@hfut.edu.cn) (Yajun Duan), [tsl-huyunhui@tasly.com](mailto:tsl-huyunhui@tasly.com) (Yunhui Hu), [jihonghan2008@nankai.edu.cn](mailto:jihonghan2008@nankai.edu.cn) (Jihong Han).

<sup>†</sup>These authors made equal contributions to this work.

## Supporting Information

### 1. Supplemental materials and methods

#### 1.1. Analysis of KDM4A/E kinase activity

##### 1.1.1. Materials

Trimethylated histone H3 peptide-biotin JMJD2A (KDM4A) or JMJD2E (KDM4E) (1–350) was purchased from Sangon Biotechnology (Shanghai, China). The activity of KDM4A or KDM4E is 0.084 or 0.14 pmole/min/ $\mu$ g. Anti-histone H3 (dimethyl K9) antibody was purchased from BPS Bioscience (Shanghai, China). L-Ascorbic acid,  $\alpha$ -ketoglutaric acid sodium salt and ammonium iron (II) sulfate hexahydrate were purchased from Sigma-Aldrich (Shanghai, China). Streptavidin-D2 and protein A-Eu cryptate were purchased from Cisbio (Wuhan, China).

##### 1.1.2. Compound's information

| Entry | Compound name                 | Stock Conc.     | Solvent | Start Conc. |
|-------|-------------------------------|-----------------|---------|-------------|
| 1     | CDDP                          | 200 mg/mL       | DMSO    | 1 mg/mL     |
| Ref   | 2,4-Pyridine dicarboxylicacid | 200 $\mu$ mol/L | DMSO    | 1000 nmol/L |

Notes: 2,4-Pyridine dicarboxylicacid (PDCA) was used as a positive control. All test samples were prepared in dimethyl sulfoxide (DMSO). The start concentration for PDCA and CDDP was 1000 nmol/L and 1 mg/mL, respectively. Ten concentration points of each compound were obtained by diluting it from the start concentration at 3-fold with PBS.

##### 1.1.3. Assay procedure

- Transfer 40 nL compound diluted solution into each well of the assay plate using Echo 550.
- Seal the assay plate and centrifuge it at  $100 \times g$  for 1 min.
- Prepare  $2 \times$  KDM4 enzyme solution and add it to each well (4  $\mu$ L/well) of the assay plate.
- Seal the assay plate and equilibrate it at room temperature for 30 min.

- e) Prepare 2 × KDM4 substrate solution and add it to each well (4 μL/well) of the assay plate.
- f) Seal the assay plate and equilibrate it at room temperature for 60 min.
- g) Prepare 2 × detection solution by mixing 2.5 μL protein-A-Eu, 0.5 μL anti-histone H3 (dimethyl K9) antibody and 1.5 μL streptavidin-d2, and adding the reaction buffer up to 2 mL. Add 2 × detection solution to each well (8 μL/well) of the assay plate.
- h) After 1 h reaction, read the plate to obtain the ratio of fluorescence at 665 nm to that at 615 nm with the Envision plate reader.

#### 1.1.4. Data analysis

Relative ratio (RR): The relative ratio [(ratio 665 nm/615 nm – ratio of background)] is calculated for each well.

% Inhibition: The inhibition (%) is calculated based on the following formula:

$$\% \text{Inhibition} = \left[ 1 - \frac{RR_{\text{cmpd}} - \overline{RR}_{\text{positive}}}{\overline{RR}_{\text{vehicle}} - \overline{RR}_{\text{positive}}} \right] \times 100$$

$\overline{RR}_{\text{positive}}$ : The average RR for the positive controls across the plate.

$\overline{RR}_{\text{vehicle}}$ : The average RR for negative controls across the plate.

Calculation of IC<sub>50</sub> and plotting the effect-dose curves: The IC<sub>50</sub> was calculated by fitting % inhibition values and log of compound concentrations to nonlinear regression (dose response–variable slope) with Graphpad 8.0.

$Y = \text{Bottom} + (\text{Top} - \text{Bottom}) / (1 + 10^{((\text{LogIC}_{50} - X) \times \text{Hill Slope}))}$

$X$ : log<sub>10</sub> of inhibitor concentration;  $Y$ : % inhibition

## 2. Supplemental tables

**Table S1** The information of antibodies used in this study.

| Antibody                     | Supplier            | Cat no.    |
|------------------------------|---------------------|------------|
| BMP3                         | ABclonal Technology | A6877      |
| NRF2                         | ABclonal Technology | A0674      |
| HRP- $\beta$ -Actin          | ABclonal Technology | AC028      |
| IL-1 $\beta$                 | ABclonal Technology | A11370     |
| p-P65                        | ABclonal Technology | AP0475     |
| SFRP4                        | ABclonal Technology | A6409      |
| SFRP5                        | ABclonal Technology | A16734     |
| SOD2                         | ABclonal Technology | A19576     |
| WIF1                         | ABclonal Technology | A12969     |
| DKK2                         | Affinity            | DF12942    |
| NKD1                         | Affinity            | AF4646     |
| Anti-histone H3 (ChIP Grade) | Abcam               | ab1220     |
| KDM4A                        | Proteintech         | 24943-1-AP |
| P65                          | Proteintech         | 10745-1-AP |
| LDLR                         | Proteintech         | 10785-1-AP |
| ATGL                         | Santa Cruz          | sc-365278  |
| APOE                         | Santa Cruz          | sc-98574   |
| FASN                         | Santa Cruz          | sc-20140   |
| HSL                          | Santa Cruz          | sc-74489   |
| TNF- $\alpha$                | Santa Cruz          | sc-52746   |

**Table S2** The results of the statistical analysis of band density for Western blots in Figs. 3–6.

**Fig. 3**

Fig. 3F [ $*P < 0.05$ ,  $**P < 0.01$ ,  $***P < 0.001$  vs. Lane 2;  $^{\wedge}P < 0.05$ ;  $^{\wedge\wedge}P < 0.01$ ,  $^{\wedge\wedge\wedge}P < 0.001$  vs. Lane 6;  $n = 4$ ]

| Gene             | Group                 |        |                      |                       |                       |                       |
|------------------|-----------------------|--------|----------------------|-----------------------|-----------------------|-----------------------|
|                  | WT                    | Ctrl   | LST                  | HST                   | CDDP                  | CST                   |
| WIF1             | 100±21 <sup>***</sup> | 52±8   | 49±3 <sup>^</sup>    | 84±11 <sup>*</sup>    | 109±4 <sup>***</sup>  | 105±12 <sup>***</sup> |
| SFRP5            | 100±37 <sup>**</sup>  | 34±6   | 50±9 <sup>^</sup>    | 85±11 <sup>*</sup>    | 80±14 <sup>*</sup>    | 109±6 <sup>***</sup>  |
| BMP3             | 100±6 <sup>*</sup>    | 47±8   | 152±28 <sup>**</sup> | 132±17 <sup>***</sup> | 102±12 <sup>*</sup>   | 187±34 <sup>***</sup> |
| $\beta$ -catenin | 100±23 <sup>***</sup> | 210±36 | 164±10               | 160±6 <sup>*</sup>    | 124±9 <sup>***</sup>  | 144±12 <sup>**</sup>  |
| SFRP4            | 100±24 <sup>*</sup>   | 64±4   | 66±12 <sup>^</sup>   | 101±4 <sup>*</sup>    | 96±2 <sup>*</sup>     | 96±4 <sup>*</sup>     |
| NKD1             | 100±35 <sup>*</sup>   | 22±7   | 60±20 <sup>^</sup>   | 78±26                 | 172±26 <sup>***</sup> | 200±45 <sup>***</sup> |
| DKK2             | 100±13 <sup>*</sup>   | 68±15  | 100±9 <sup>*</sup>   | 101±10 <sup>*</sup>   | 144±14 <sup>***</sup> | 116±10 <sup>**</sup>  |
| Lane             | 1                     | 2      | 3                    | 4                     | 5                     | 6                     |

**Fig. 4**

Fig. 4B [ $*P < 0.05$ ,  $**P < 0.01$ ,  $***P < 0.001$  vs. Lane 2;  $^{\wedge}P < 0.05$ ,  $^{\wedge\wedge}P < 0.01$  vs. Lane 6;  $n = 4$ ]

| Gene          | Group                    |        |                          |                          |                          |                          |
|---------------|--------------------------|--------|--------------------------|--------------------------|--------------------------|--------------------------|
|               | WT                       | Ctrl   | LST                      | HST                      | CDDP                     | CST                      |
| KDM4A         | 100±16<br><sup>**</sup>  | 282±51 | 244±29                   | 286±79                   | 101±72<br><sup>**</sup>  | 151±15<br><sup>*</sup>   |
| P65           | 100±22<br><sup>***</sup> | 376±84 | 322±30<br><sup>^</sup>   | 225±34<br><sup>*</sup>   | 221±48<br><sup>*</sup>   | 159±47<br><sup>***</sup> |
| p-P65         | 100±19<br><sup>***</sup> | 492±25 | 185±37<br><sup>***</sup> | 150±33<br><sup>***</sup> | 112±28<br><sup>***</sup> | 147±64<br><sup>***</sup> |
| IL-1 $\beta$  | 100±14<br><sup>**</sup>  | 156±14 | 146±10<br><sup>^</sup>   | 111±21<br><sup>*</sup>   | 112±19<br><sup>*</sup>   | 103±19<br><sup>**</sup>  |
| TNF- $\alpha$ | 100±13<br><sup>***</sup> | 260±19 | 165±41<br><sup>***</sup> | 117±34<br><sup>***</sup> | 117±38<br><sup>***</sup> | 72±16<br><sup>***</sup>  |
| Lane          | 1                        | 2      | 3                        | 4                        | 5                        | 6                        |

Fig. 4G [ $*P < 0.05$ ,  $**P < 0.01$ ,  $***P < 0.001$  vs. Lane 2;  $n = 3$ ]

| Cell    | Group         |          |        |          |
|---------|---------------|----------|--------|----------|
|         | OGD           | -        | +      | +        |
|         | CDDP          | -        | -      | +        |
| H9c2    | KDM4A         | 100±2*   | 140±19 | 72±12**  |
|         | P65           | 100±4    | 100±11 | 102±6    |
|         | p-P65         | 100±4**  | 196±10 | 122±16*  |
|         | IL-1 $\beta$  | 100±19*  | 187±7  | 133±16** |
|         | TNF- $\alpha$ | 100±3*** | 153±23 | 78±6***  |
| iPSC-CM | KDM4A         | 100±1*   | 149±26 | 50±4**   |
|         | P65           | 100±18   | 98±8   | 91±5     |
|         | p-P65         | 100±18*  | 188±11 | 77±3**   |
|         | IL-1 $\beta$  | 100±12*  | 148±14 | 72±4*    |
|         | TNF- $\alpha$ | 100±10** | 192±19 | 76±26**  |
| Lane    |               | 1        | 2      | 3        |

Fig. 4H [ $**P < 0.01$ ,  $***P < 0.001$  vs. Lane 2;  $^{\wedge}P < 0.01$ ,  $^{\wedge\wedge}P < 0.001$  vs. Lane 5;  $n = 3$ ]

| RAW 264.7     |       |       |                    |                          |        |
|---------------|-------|-------|--------------------|--------------------------|--------|
| OGD           | -     | +     | +                  | +                        | +      |
| CDDP          | -     | -     | -                  | +                        | +      |
| PDCA          | -     | -     | +                  | -                        | +      |
| KDM4A         | 100±4 | 169±8 | 110±5              | 100±1                    | 106±8  |
|               |       |       | ***                | *** $\wedge\wedge$       | ***    |
| P65           | 100±9 | 101±5 | 99±6               | 103±5                    | 100±11 |
| p-P65         | 100±9 | 176±4 | 146±1              | 114±3                    | 124±1  |
|               |       |       | *** $\wedge\wedge$ | ***                      | ***    |
| IL-1 $\beta$  | 100±4 | 131±4 | 99±5               | 95±5                     | 80±10  |
|               | **    |       | **                 | **                       | ***    |
| TNF- $\alpha$ | 100±7 | 242±4 | 187±4              | 89±7                     | 140±22 |
|               | ***   |       | ***                | *** $\wedge\wedge\wedge$ | ***    |
| Lane          | 1     | 2     | 3                  | 4                        | 5      |

Fig. 4J [ $*P < 0.05$ ,  $**P < 0.01$ ,  $***P < 0.001$  vs. Lane 2;  $^{\wedge}P < 0.05$ ,  $^{\wedge\wedge}P < 0.01$  vs. Lane 5;  $n = 3$ ]

| RAW 264.7     |        |        |                 |                 |        |
|---------------|--------|--------|-----------------|-----------------|--------|
| OGD           | –      | +      | +               | +               | +      |
| CDDP          | –      | –      | –               | +               | +      |
| siKDM4A       | –      | –      | +               | –               | +      |
| siCtrl        | +      | +      | –               | +               | –      |
| KDM4A         | 100±10 | 151±8  | 106±1           | 76±7            | 85±11  |
|               | **     |        | *               | ***             | ***    |
| P65           | 100±7  | 102±4  | 101±2           | 106±7           | 101±8  |
| p-P65         | 100±6  | 189±10 | 164±6           | 150±10          | 124±4  |
|               | ***    |        | ** <sup>^</sup> | ** <sup>^</sup> | ***    |
| IL-1 $\beta$  | 100±4  | 234±10 | 170±16          | 130±19          | 117±23 |
|               | ***    |        | *               | * <sup>^</sup>  | ***    |
| TNF- $\alpha$ | 100±4  | 140±6  | 100±3           | 77±14           | 76±8   |
|               | **     |        | **              | ***             | ***    |
| Lane          | 1      | 2      | 3               | 4               | 5      |

**Fig. 5**

Fig. 5D [ $*P < 0.05$ ,  $**P < 0.01$ ,  $***P < 0.001$  vs. Lane 2;  $^{\wedge}P < 0.05$ ,  $^{\wedge\wedge}P < 0.01$  vs. Lane 6;  $n = 4$ ]

| Gene | Group  |      |               |        |        |        |
|------|--------|------|---------------|--------|--------|--------|
|      | WT     | Ctrl | LST           | HST    | CDDP   | CST    |
| NRF2 | 100±11 | 66±5 | 80±10         | 96±9   | 135±21 | 117±12 |
|      | *      |      | <sup>^</sup>  |        | ***    | **     |
| CAT  | 100±3  | 48±4 | 82±4          | 115±19 | 138±40 | 151±18 |
|      | *      |      | <sup>^^</sup> | *      | ***    | ***    |
| SOD2 | 100±20 | 49±4 | 72±4          | 100±16 | 120±34 | 131±15 |
|      | *      |      | <sup>^</sup>  | *      | **     | ***    |
| Lane | 1      | 2    | 3             | 4      | 5      | 6      |

Fig. 5G [ $*P < 0.05$ ,  $**P < 0.01$ ,  $***P < 0.001$  vs. Lane 2;  $n = 3$ ]

| Cell    | Group |          |       |          |
|---------|-------|----------|-------|----------|
|         | OGD   | -        | +     | +        |
|         | CDDP  | -        | -     | +        |
| H9c2    | NRF2  | 100±6*** | 26±3  | 49±4**   |
|         | CAT   | 100±7*** | 42±7  | 76±6**   |
|         | SOD2  | 100±21** | 26±14 | 57±12*   |
| iPSC-CM | NRF2  | 100±17*  | 51±14 | 126±12** |
|         | CAT   | 100±18*  | 59±6  | 126±11** |
|         | SOD2  | 100±14** | 55±1  | 106±16** |
|         | Lane  | 1        | 2     | 3        |

Fig. 5H [ $*P < 0.05$ ,  $**P < 0.01$ ,  $***P < 0.001$  vs. Lane 2;  $^{\wedge}P < 0.01$ ,  $^{\wedge\wedge}P < 0.001$  vs. Lane 5,  $n = 3$ ]

| H9c2  |           |       |                    |                     |           |
|-------|-----------|-------|--------------------|---------------------|-----------|
| OGD   | -         | +     | +                  | +                   | +         |
| CDDP  | -         | -     | -                  | +                   | +         |
| PDCA  | -         | -     | +                  | -                   | +         |
| KDM4A | 100±5**   | 127±8 | 98±3**             | 93±8**              | 90±1***   |
| NRF2  | 100±7*    | 79±2  | 187±9***           | 180±3***            | 214±7***  |
| CAT   | 100±3***  | 75±3  | 87±4* <sup>^</sup> | 100±2* <sup>^</sup> | 127±10*** |
| SOD2  | 100±16*** | 17±5  | 145±20***          | 118±8***            | 119±10*** |
| Lane  | 1         | 2     | 3                  | 4                   | 5         |

Fig. 5J [ $*P < 0.05$ ,  $**P < 0.01$ ,  $***P < 0.001$  vs. Lane 2;  $^{\wedge\wedge}P < 0.001$  vs. Lane 5;  $n = 3$ ]

| H9c2 |       |      |       |                 |       |
|------|-------|------|-------|-----------------|-------|
| OGD  | -     | +    | +     | +               | +     |
| CDDP | -     | -    | -     | +               | +     |
| PDCA | -     | -    | +     | -               | +     |
| NRF2 | 100±5 | 82±2 | 183±1 | 108±10          | 197±1 |
|      |       |      | ***   | ** <sup>^</sup> | ***   |
| Lane | 1     | 2    | 3     | 4               | 5     |



Fig. 5K [ $*P < 0.05$ ,  $***P < 0.001$  vs. Lane 2;  $^{\wedge}P < 0.05$ ,  $^{\wedge\wedge}P < 0.01$ ,  $^{\wedge\wedge\wedge}P < 0.001$  vs. Lane 5;  $n = 3$ ]

| H9c2    |        |       |       |                    |                    |
|---------|--------|-------|-------|--------------------|--------------------|
| OGD     | –      | +     | +     | +                  | +                  |
| CDDP    | –      | –     | –     | +                  | +                  |
| siKDM4A | –      | –     | +     | –                  | +                  |
| siCtrl  | +      | +     | –     | +                  | –                  |
| KDM4A   | 100±4  | 202±8 | 115±7 | 146±7              | 120±6              |
|         | ***    |       | ***   | *** <sup>^</sup>   | ***                |
| NRF2    | 100±10 | 22±1  | 86±4  | 90±7               | 116±4              |
|         | ***    |       | ***   | *** <sup>^^</sup>  | *** <sup>^</sup>   |
| CAT     | 100±4  | 29±2  | 122±2 | 137±4              | 147±9              |
|         | ***    |       | ***   | *** <sup>^^</sup>  | ***                |
| SOD2    | 100±5  | 74±3  | 215±6 | 174±4              | 383±8              |
|         | *      |       | ***   | *** <sup>^^^</sup> | *** <sup>^^^</sup> |
| Lane    | 1      | 2     | 3     | 4                  | 5                  |

**Fig. 6**

Fig. 6E [ $*P < 0.05$ ,  $**P < 0.01$ ,  $***P < 0.001$  vs. Lane 2;  $n = 4$ ]

| Gene | Group  |        |        |        |        |        |
|------|--------|--------|--------|--------|--------|--------|
|      | WT     | Ctrl   | LST    | HST    | CDDP   | CST    |
| FASN | 100±12 | 150±11 | 107±20 | 112±10 | 88±13  | 107±16 |
|      | **     |        | *      | *      | ***    | *      |
| SCD1 | 100±22 | 502±66 | 145±15 | 150±30 | 77±15  | 96±37  |
|      | ***    |        | ***    | ***    | ***    | ***    |
| DGAT | 100±5  | 309±40 | 242±44 | 197±26 | 186±42 | 167±37 |
|      | ***    |        |        | *      | **     | **     |
| HSL  | 100±26 | 63±5   | 74±7   | 84±9   | 102±10 | 101±8  |
|      | *      |        |        |        | *      | *      |
| ATGL | 100±3  | 85±5   | 162±24 | 259±10 | 258±41 | 244±2  |
|      |        |        | *      | *      | ***    | **     |
| Lane | 1      | 2      | 3      | 4      | 5      | 6      |

Fig. 6F [ $*P < 0.05$ ,  $**P < 0.01$ ,  $***P < 0.001$  vs. Lane 2;  $^^^P < 0.001$  vs. Lane 6;  $n = 4$ ]

| Gene   | Group         |      |                |             |              |               |
|--------|---------------|------|----------------|-------------|--------------|---------------|
|        | WT            | Ctrl | LST            | HST         | CDDP         | CST           |
| ABCG5  | 100±9<br>***  | 30±2 | 66±5<br>***^^^ | 68±8<br>*** | 116±6<br>*** | 124±13<br>*** |
| CYP7A1 | 100±13<br>*** | 54±6 | 66±14<br>^^^   | 388±8<br>** | 84±10<br>*   | 151±9<br>***  |
| Lane   | 1             | 2    | 3              | 4           | 5            | 6             |

**Table S3** The results of statistical analysis of band density for Western blots in Supplementary Figs. S4, S5 and S7.

Fig. S4 (Fig. S4C, D): [ $*P < 0.05$ ,  $**P < 0.01$ ,  $***P < 0.001$  vs. Lane 2;  $n = 3$ ]

| Cell    | Group            |          |        |          |
|---------|------------------|----------|--------|----------|
|         | OGD              | -        | +      | +        |
|         | CDDP             | -        | -      | +        |
| H9c2    | SFRP4            | 100±18*  | 48±11  | 48±14*   |
|         | SFRP5            | 100±28*  | 39±6   | 93±12*   |
|         | BMP3             | 100±21   | 63±14  | 141±45*  |
|         | WIF1             | 100±11*  | 24±5   | 68±23*   |
|         | NKD1             | 100±15   | 70±8   | 173±29** |
|         | $\beta$ -catenin | 100±34*  | 178±25 | 105±10*  |
|         | DKK2             | 100±6*   | 58±4   | 115±21** |
| iPSC-CM | SFRP4            | 100±8**  | 22±13  | 61±23    |
|         | SFRP5            | 100±20*  | 50±7   | 110±2**  |
|         | WIF1             | 100±23*  | 31±6   | 80±10*   |
|         | BMP3             | 100±21   | 63±14  | 141±45   |
|         | NKD1             | 100±11** | 13±1   | 73±32*   |
|         | DKK2             | 100±9*** | 43±5   | 69±8*    |
|         | $\beta$ -catenin | 100±11*  | 12±1   | 28±2     |
| Lane    |                  | 1        | 2      | 3        |

Fig. S5 (Fig. S5I) [ $*P < 0.05$ ,  $**P < 0.01$ ,  $***P < 0.001$  vs. Lane 2;  $^{\wedge}P < 0.05$ ,  $^{\wedge\wedge}P < 0.01$  vs. Lane 5;  $n = 3$ ]

| RAW 264.7     |          |       |                      |                      |         |
|---------------|----------|-------|----------------------|----------------------|---------|
| OGD           | -        | +     | +                    | +                    | +       |
| DSDf          | -        | -     | -                    | +                    | +       |
| PDCA          | -        | -     | +                    | -                    | +       |
| KDM4A         | 100±4**  | 125±4 | 95±3*                | 83±10***             | 72±4*** |
| p-P65         | 100±1*** | 113±3 | 93±6*** <sup>^</sup> | 67±1*** <sup>^</sup> | 93±3*** |
| P65           | 100±10   | 102±2 | 103±4                | 96±12                | 108±4   |
| IL-1 $\beta$  | 100±6*** | 130±3 | 85±8* <sup>^</sup>   | 87±6***              | 96±1*** |
| TNF- $\alpha$ | 100±7**  | 134±2 | 111±5**              | 107±8***             | 74±1*** |
| Lane          | 1        | 2     | 3                    | 4                    | 5       |

Fig. S5 (Fig. S5K) [ $***P < 0.001$  vs. Lane 2;  $^{\wedge}P < 0.05$ ,  $^{\wedge\wedge}P < 0.01$ ,  $^{\wedge\wedge\wedge}P < 0.001$  vs. Lane 5;  $n = 3$ ]

| RAW 264.7     |              |       |                                        |                                                     |              |
|---------------|--------------|-------|----------------------------------------|-----------------------------------------------------|--------------|
| OGD           | -            | +     | +                                      | +                                                   | +            |
| DSDf          | -            | -     | -                                      | +                                                   | +            |
| siKDM4A       | -            | -     | +                                      | -                                                   | +            |
| siCtrl        | +            | +     | -                                      | +                                                   | -            |
| KDM4A         | 100±2<br>*** | 133±4 | 92±6<br>*** <sup>^</sup> <sup>^</sup>  | 66±6<br>***                                         | 61±1<br>***  |
| p-P65         | 100±1<br>*** | 155±1 | 130±5<br>***                           | 120±2<br>*** <sup>^</sup>                           | 135±3<br>*** |
| P65           | 100±1        | 105±2 | 95±2                                   | 103±3                                               | 95±8         |
| IL-1 $\beta$  | 100±4<br>*** | 152±5 | 129±4<br>***                           | 111±3<br>*** <sup>^</sup> <sup>^</sup>              | 133±3<br>*** |
| TNF- $\alpha$ | 100±4<br>*** | 190±5 | 134±2<br>*** <sup>^</sup> <sup>^</sup> | 144±6<br>*** <sup>^</sup> <sup>^</sup> <sup>^</sup> | 106±8<br>*** |
| Lane          | 1            | 2     | 3                                      | 4                                                   | 5            |

Fig. S5 (Fig. S5L) [ $*P < 0.05$ ,  $**P < 0.01$ ,  $***P < 0.001$  vs. Lane 2;  $^{\wedge}P < 0.05$  vs. Lane 5;  $n = 3$ ]

| RAW 264.7     |        |        |                 |                 |        |
|---------------|--------|--------|-----------------|-----------------|--------|
| OGD           | -      | +      | +               | +               | +      |
| XST           | -      | -      | -               | +               | +      |
| PDCA          | -      | -      | +               | -               | +      |
| KDM4A         | 100±14 | 447±31 | 334±15          | 268±14          | 344±8  |
|               | ***    |        | ***             | *** $^{\wedge}$ | **     |
| p-P65         | 100±2  | 205±12 | 146±9           | 177±4           | 178±3  |
|               | ***    |        | *** $^{\wedge}$ | *               | *      |
| P65           | 100±3  | 103±5  | 106±4           | 104±4           | 105±3  |
| IL-1 $\beta$  | 100±3  | 180±3  | 96±10           | 132±13          | 87±17  |
|               | ***    |        | ***             | *** $^{\wedge}$ | ***    |
| TNF- $\alpha$ | 100±8  | 303±16 | 203±10          | 179±4           | 210±14 |
|               | ***    |        | ***             | ***             | ***    |
| Lane          | 1      | 2      | 3               | 4               | 5      |

Fig. S5 (Fig. S5N) [ $*P < 0.05$ ,  $**P < 0.01$ ,  $***P < 0.001$  vs. Lane 2;  $n = 3$ ]

| RAW 264.7     |        |       |       |                 |        |
|---------------|--------|-------|-------|-----------------|--------|
| OGD           | -      | +     | +     | +               | +      |
| XST           | -      | -     | -     | +               | +      |
| siKDM4A       | -      | -     | +     | -               | +      |
| siCtrl        | +      | +     | -     | +               | -      |
| KDM4A         | 100±7  | 186±1 | 169±1 | 139±8           | 163±1  |
|               | ***    |       | *     | *** $^{\wedge}$ | **     |
| p-P65         | 100±8  | 181±6 | 151±1 | 147±5           | 162±5  |
|               | ***    |       | **    | ***             | *      |
| P65           | 100±10 | 107±7 | 105±7 | 108±7           | 107±2  |
| IL-1 $\beta$  | 100±7  | 146±1 | 120±3 | 111±11          | 125±3  |
|               | ***    |       | *     | **              | *      |
| TNF- $\alpha$ | 100±3  | 155±1 | 96±3  | 86±6            | 98±5.2 |
|               | ***    |       | ***   | ***             | ***    |
| Lane          | 1      | 2     | 3     | 4               | 5      |

Fig. S7 (Fig. S7C) [ $**P < 0.01$ ,  $***P < 0.001$  vs. Lane 1;  $n = 3$ ]

| H9c2  |       |       |       |         |          |          |
|-------|-------|-------|-------|---------|----------|----------|
|       | 0     | 0.25  | 0.5   | 1       | 2        | 4        |
| NRF2  | 100±2 | 80±10 | 105±3 | 133±9** | 139±10** | 156±3*** |
| KEAP1 | 100±3 | 104±7 | 88±5  | 75±2*** | 75±4**   | 90±3     |
| Lane  | 1     | 2     | 3     | 4       | 5        | 6        |

Fig. S7 (Fig. S7D) [ $*P < 0.05$ ,  $**P < 0.01$ ,  $***P < 0.001$  vs. Lane 2;  $^{\wedge}P < 0.05$ ,  $^{\wedge\wedge}P < 0.01$ ,  $^{\wedge\wedge\wedge}P < 0.001$  vs. Lane 5;  $n = 3$ ]

| H9c2  |              |       |                           |                              |               |
|-------|--------------|-------|---------------------------|------------------------------|---------------|
|       | 1            | 2     | 3                         | 4                            | 5             |
| OGD   | –            | +     | +                         | +                            | +             |
| DSDF  | –            | –     | –                         | +                            | +             |
| PDCA  | –            | –     | +                         | –                            | +             |
| KDM4A | 100±4<br>**  | 126±8 | 87±9<br>*** <sup>^^</sup> | 57±2<br>***                  | 48±2<br>***   |
| NRF2  | 100±9<br>*   | 71±5  | 113±5<br>*                | 161±6<br>*** <sup>^</sup>    | 131±9<br>***  |
| CAT   | 100±3<br>*** | 30±1  | 66±2<br>***               | 93±5<br>*** <sup>^</sup>     | 59±3<br>***   |
| SOD2  | 100±5<br>*   | 74±10 | 77±3<br><sup>^^^</sup>    | 249±12<br>*** <sup>^^^</sup> | 163±13<br>*** |
| Lane  | 1            | 2     | 3                         | 4                            | 5             |

Fig. S7 (Fig. S7E) [ $*P < 0.05$ ,  $***P < 0.001$  vs. Lane 2;  $^{\wedge\wedge}P < 0.001$ , vs. Lane 5;  $n = 3$ ]

| H9c2 |            |      |                             |                              |               |
|------|------------|------|-----------------------------|------------------------------|---------------|
|      | 1          | 2    | 3                           | 4                            | 5             |
| OGD  | –          | +    | +                           | +                            | +             |
| DSDF | –          | –    | –                           | +                            | +             |
| PDCA | –          | –    | +                           | –                            | +             |
| NRF2 | 100±4<br>* | 86±1 | 240±9<br>*** <sup>^^^</sup> | 243±12<br>*** <sup>^^^</sup> | 371±10<br>*** |
| Lane | 1          | 2    | 3                           | 4                            | 5             |

Fig. S7 (Fig. S7G) [ $*P < 0.05$ ,  $***P < 0.001$  vs. Lane 2;  $^{\wedge}P < 0.05$ ,  $^{\wedge\wedge}P < 0.01$ ,  $^{\wedge\wedge\wedge}P < 0.001$  vs. Lane 5;  $n = 3$ ]

| H9c2    |       |       |                    |                    |        |
|---------|-------|-------|--------------------|--------------------|--------|
| OGD     | -     | +     | +                  | +                  | +      |
| DSDF    | -     | -     | -                  | +                  | +      |
| siKDM4A | -     | -     | +                  | -                  | +      |
| siCtrl  | +     | +     | -                  | +                  | -      |
| KDM4A   | 100±1 | 164±9 | 132±10             | 122±4              | 97±3   |
|         | ***   |       | ***                | *** <sup>^</sup>   | ***    |
| NRF2    | 100±1 | 26±1  | 107±3              | 86±3               | 112±14 |
|         | ***   |       | *** <sup>^^</sup>  | *** <sup>^</sup>   | ***    |
| CAT     | 100±7 | 32±2  | 128±3              | 113±4              | 118±2  |
|         | ***   |       | *** <sup>^^</sup>  | ***                | ***    |
| SOD2    | 100±4 | 19±3  | 62±2               | 49±5               | 73±3   |
|         | *     |       | *** <sup>^^^</sup> | *** <sup>^^^</sup> | ***    |
| Lane    | 1     | 2     | 3                  | 4                  | 5      |

Fig. S7 (Fig. S7H) [ $*P < 0.05$ ,  $**P < 0.01$ ,  $***P < 0.001$  vs. Lane 2;  $^{\wedge}P < 0.05$ ,  $^{\wedge\wedge\wedge}P < 0.001$  vs. Lane 5;  $n = 3$ ]

| H9c2  |         |       |                   |        |        |
|-------|---------|-------|-------------------|--------|--------|
| OGD   | -       | +     | +                 | +      | +      |
| XST   | -       | -     | -                 | +      | +      |
| PDCA  | -       | -     | +                 | -      | +      |
| KDM4A | 100±4.6 | 128±4 | 96±8              | 68±6   | 66±13  |
|       | *       |       | * <sup>^</sup>    | ***    | ***    |
| NRF2  | 100±6   | 69±3  | 110±5             | 179±4  | 198±16 |
|       | *       |       | ** <sup>^^^</sup> | ***    | ***    |
| CAT   | 100±3   | 25±3  | 65±9              | 74±9   | 81±10  |
|       | ***     |       | **                | ***    | ***    |
| SOD2  | 100±5   | 41±1  | 118±5             | 136±15 | 138±13 |
|       | ***     |       | ***               | ***    | ***    |
| Lane  | 1       | 2     | 3                 | 4      | 5      |

Fig. S7 (Fig. S7I) [ $*P < 0.05$ ,  $**P < 0.01$ ,  $***P < 0.001$  vs. Lane 2;  $^^P < 0.001$  vs. Lane 5;  $n = 3$ ]

| H9c2 |       |      |        |       |        |
|------|-------|------|--------|-------|--------|
| OGD  | -     | +    | +      | +     | +      |
| XST  | -     | -    | -      | +     | +      |
| PDCA | -     | -    | +      | -     | +      |
| NRF2 | 100±3 | 54±2 | 131±20 | 123±3 | 223±17 |
|      | *     |      | ***^^^ | **^^^ | ***    |
| Lane | 1     | 2    | 3      | 4     | 5      |

Fig. S7 (Fig. S7K) [ $***P < 0.001$  vs. Lane 2;  $^P < 0.05$ ,  $^^P < 0.001$  vs. Lane 5;  $n = 3$ ]

| H9c2    |        |       |        |        |       |
|---------|--------|-------|--------|--------|-------|
| OGD     | -      | +     | +      | +      | +     |
| XST     | -      | -     | -      | +      | +     |
| siKDM4A | -      | -     | +      | -      | +     |
| siCtrl  | +      | +     | -      | +      | -     |
| KDM4A   | 100±6  | 198±9 | 88±1   | 45±    | 95±8  |
|         | ***    |       | ***    | 3***^  | ***   |
| NRF2    | 100±12 | 33±1  | 19±4   | 73±4   | 93±1  |
|         | ***    |       | ***    | ***^   | ***   |
| CAT     | 100±7  | 17±1  | 136±4  | 141±4  | 193±4 |
|         | ***    |       | ***^^^ | ***^^^ | ***   |
| SOD2    | 100±5  | 74±3  | 215±6  | 174±4  | 383±8 |
|         | ***    |       | ***^^^ | ***^^^ | ***   |
| Lane    | 1      | 2     | 3      | 4      | 5     |

Fig. S7 (Fig. S7L) [ $*P < 0.05$ ,  $**P < 0.01$ ,  $***P < 0.001$  vs. Lane 2;  $^^P < 0.01$ ,  $^^^P < 0.001$  vs. Lane 6;  $n = 4$ ]

| Gene  | Group  |        |        |        |        |        |
|-------|--------|--------|--------|--------|--------|--------|
|       | WT     | Ctrl   | LST    | HST    | CDDP   | CST    |
| KEAP1 | 100±15 | 283±51 | 244±29 | 286±78 | 101±72 | 151±14 |
|       | ***    |        | ^^^    | ^^     | **     | *      |
| Lane  | 1      | 2      | 3      | 4      | 5      | 6      |

Fig. S7 (Fig. S7M) [ $*P < 0.05$ ,  $***P < 0.001$  vs. Lane 2;  $^^^P < 0.001$  vs. Lane 5;  $n = 3$ ]

| H9c2  |        |       |            |         |         |
|-------|--------|-------|------------|---------|---------|
| OGD   | -      | +     | +          | +       | +       |
| CDDP  | -      | -     | -          | +       | +       |
| PDCA  | -      | -     | +          | -       | +       |
| KEAP1 | 100±3* | 121±2 | 101±12*^^^ | 47±2*** | 40±2*** |
| Lane  | 1      | 2     | 3          | 4       | 5       |

Fig. S7 (Fig. S7N) [ $**P < 0.01$ ,  $***P < 0.001$  vs. Lane 2;  $^^^P < 0.001$ , vs. Lane 5;  $n = 3$ ]

| H9c2  |       |       |        |        |      |
|-------|-------|-------|--------|--------|------|
| OGD   | -     | +     | +      | +      | +    |
| DSDF  | -     | -     | -      | +      | +    |
| PDCA  | -     | -     | +      | -      | +    |
| KEAP1 | 100±3 | 125±1 | 59±5   | 73±8   | 15±1 |
|       | **    |       | ***^^^ | ***^^^ | ***  |
| Lane  | 1     | 2     | 3      | 4      | 5    |



Fig. S7 (Fig. S7O) [**\*\*** $P < 0.01$ , **\*\*\*** $P < 0.001$  vs. Lane 2; **^** $P < 0.05$  vs. Lane 5;  $n = 3$ ]

| H9c2  |       |       |      |       |      |
|-------|-------|-------|------|-------|------|
| OGD   | -     | +     | +    | +     | +    |
| XST   | -     | -     | -    | +     | +    |
| PDCA  | -     | -     | +    | -     | +    |
| KEAP1 | 100±1 | 129±5 | 60±5 | 90±12 | 63±4 |
|       | **    |       | ***  | ***^  | ***  |
| Lane  | 1     | 2     | 3    | 4     | 5    |

**Table S4** The sequences of primers for qRT-PCR analysis of mouse genes.

| Genes        | Primers | Sequence (5'–3')        | Product (bp) |
|--------------|---------|-------------------------|--------------|
| <i>Bmp3</i>  | forward | ACTCCGTGAGACTGAGCCAA    | 106          |
|              | reverse | CCTGTCATAGAGCCACAGCATA  |              |
| <i>Cat</i>   | forward | AGCGACCAGATGAAGCAGTG    | 181          |
|              | reverse | TCCGCTCTGTCAAAGTGTG     |              |
| <i>Dkk2</i>  | forward | CTGATGCGGGTCAAGGATTCA   | 126          |
|              | reverse | CTCCCCCTCTAGAGAGGACTT   |              |
| <i>Il-1β</i> | forward | GCAACTGTTCCCTGAACTCAACT | 89           |
|              | reverse | ATCTTTTGGGGTCCGTCAACT   |              |
| <i>Kdm4a</i> | forward | GACATAGTGAGTCAGGACTGTCT | 105          |
|              | reverse | GGCCACAACTTAGCCCCATA    |              |
| <i>Nkd1</i>  | forward | AGGAAAGGCATCGAGGAGTG    | 172          |
|              | reverse | TCGCTCAGTCTCTCCATTCTC   |              |
| <i>Nrf2</i>  | forward | TCTTGGAGTAAGTCGAGAAGTGT | 140          |
|              | reverse | GTTGAAACTGAGCGAAAAAGGC  |              |
| <i>p65</i>   | forward | AGGCTTCTGGGCCTTATGTG    | 111          |
|              | reverse | TGCTTCTCTCGCCAGGAATAC   |              |
| <i>Sfrp4</i> | forward | AGAAGGTCCATACAGTGGGAAG  | 102          |
|              | reverse | GTTACTGCGACTGGTGCGA     |              |
| <i>Sfrp5</i> | forward | CACTGCCACAAGTTCCCCC     | 139          |
|              | reverse | TCTGTTCCATGAGGCCATCAG   |              |
| <i>Sod2</i>  | forward | CAGACCTGCCTTACGACTATGG  | 113          |
|              | reverse | CTCGGTGGCGTTGAGATTGTT   |              |
| <i>Tnf-α</i> | forward | GACGTGGAAGTGGCAGAAGAG   | 228          |
|              | reverse | TTGGTGGTTTGTGAGTGTGAG   |              |
| <i>Wif1</i>  | forward | TCTGGAGCATCCTACCTTGC    | 106          |
|              | reverse | ATGAGCACTCTAGCCTGATGG   |              |
| <i>Gapdh</i> | forward | TGTGTCCGTCGTGGATCTGA    | 150          |
|              | reverse | TTGCTGTTGAAGTCGCAGGAG   |              |

**Table S5** The detailed information of 45 FDA-approved drugs for CHD.

| Drug Name           | Drug Bank ID | MoAs for CHD                     | SMILE                                                                                            |
|---------------------|--------------|----------------------------------|--------------------------------------------------------------------------------------------------|
| Benazepril          | DB00542      | ACE inhibitors                   | <chem>CCOC(=O)C(CCC1=CC=CC=C1)NC2CCC3=CC=CC=C3N(C2=O)C(=O)O</chem>                               |
| Captopril           | DB01197      | ACE inhibitors                   | <chem>CC(CS)C(=O)N1CCCC1C(=O)O</chem>                                                            |
| Enalapril           | DB00584      | ACE inhibitors                   | <chem>CCOC(=O)C(CCC1=CC=CC=C1)NC(C)C(=O)N2CCCC2C(=O)O</chem>                                     |
| Fosinopril          | DB00492      | ACE inhibitors                   | <chem>CCC(=O)OC(C(C)C)OP(=O)(CCC1=CC=CC=C1)CC(=O)N2CC(CC2C(=O)O)C3CCCCC3</chem>                  |
| Lisinopril          | DB00722      | ACE inhibitors                   | <chem>C1CC(N(C1)C(=O)C(CCCCN)NC(CCC2=CC=CC=C2)C(=O)O)C(=O)O</chem>                               |
| Perindopril         | DB00790      | ACE inhibitors                   | <chem>CCCC(C(=O)OCC)NC(C)C(=O)N1C2CCCCC2CC1C(=O)O</chem>                                         |
| Quinapril           | DB00881      | ACE inhibitors                   | <chem>CCOC(=O)C(CCC1=CC=CC=C1)NC(C)C(=O)N2CC3=CC=CC=C3CC2C(=O)O</chem>                           |
| Ramipril            | DB00178      | ACE inhibitors                   | <chem>CCOC(=O)C(CCC1=CC=CC=C1)NC(C)C(=O)N2C3CCCC3CC2C(=O)O</chem>                                |
| Trandolapril        | DB00519      | ACE inhibitors                   | <chem>CCOC(=O)C(CCC1=CC=CC=C1)NC(C)C(=O)N2C3CCCCC3CC2C(=O)O</chem>                               |
| Azilsartan medoxmil | NA           | Angiotensin II receptor blockers | <chem>CCOC1=NC2=C(N1CC1=CC=C(C=C1)C1=CC=CC=C1C1=NOC(=O)N1)C(=CC=C2)C(=O)OCC1=C(C)OC(=O)O1</chem> |
| Candesartan         | DB13919      | Angiotensin II receptor blockers | <chem>CCOC1=NC2=CC=CC(=C2N1CC3=CC=C(C=C3)C4=CC=CC=C4C5=NNN=N5)C(=O)O</chem>                      |
| Eprosartan          | DB00876      | Angiotensin II receptor blockers | <chem>CCCCC1=NC=C(N1CC2=CC=C(C=C2)C(=O)O)C=C(CC3=CC=CS3)C(=O)O</chem>                            |
| Olmesartan          | DB00275      | Angiotensin II receptor blockers | <chem>CCCC1=NC(=C(N1CC2=CC=C(C=C2)C3=CC=CC=C3C4=NNN=N4)C(=O)O)C(C)(C)O</chem>                    |
| Irbesartan          | DB01029      | Angiotensin II receptor blockers | <chem>CCCCC1=NC2(CCCC2)C(=O)N1CC3=CC=C(C=C3)C4=CC=CC=C4C5=NNN=N5</chem>                          |

| Drug Name   | Drug Bank ID | MoAs for CHD                     | SMILE                                                                                   |
|-------------|--------------|----------------------------------|-----------------------------------------------------------------------------------------|
| Losartan    | DB00678      | Angiotensin II receptor blockers | <chem>CCCCC1=NC(=C(N1CC2=CC=C(C=C2)C3=CC=CC=C3C4=NNN=N4)CO)C1</chem>                    |
| Telmisartan | DB00966      | Angiotensin II receptor blockers | <chem>CCCC1=NC2=C(N1CC3=CC=C(C=C3)C4=CC=CC=C4C(=O)O)C=C(C=C2C)C5=NC6=CC=CC=C6N5C</chem> |
| Valsartan   | DB00177      | Angiotensin II receptor blockers | <chem>CCCCC(=O)N(CC1=CC=C(C=C1)C2=CC=CC=C2C3=NNN=N3)C(C(C)C)C(=O)O</chem>               |
| Aspirin     | DB00945      | Antiplatelet                     | <chem>CC(=O)OC1=CC=CC=C1C(=O)O</chem>                                                   |
| Clopidogrel | DB00758      | Antiplatelet                     | <chem>COC(=O)C(C1=CC=CC=C1Cl)N2CCC3=C(C2)C=CS3</chem>                                   |
| Warfarin    | DB00682      | Antithrombotic                   | <chem>CC(=O)CC(C1=CC=CC=C1)C2=C(C3=CC=CC=C3OC2=O)O</chem>                               |
| Atenolol    | DB00335      | Beta blocking agents             | <chem>CC(C)NCC(COC1=CC=C(C=C1)C(C=O)N)O</chem>                                          |
| Carvedilol  | DB01136      | Beta blocking agents             | <chem>COC1=CC=CC=C1OCCNCC(CO C2=CC=CC3=C2C4=CC=CC=C4 N3)O</chem>                        |
| Labetalol   | DB00598      | Beta blocking agents             | <chem>CC(CCC1=CC=CC=C1)NCC(C2=CC(=C(C=C2)O)C(=O)N)O</chem>                              |
| Metoprolol  | DB00264      | Beta blocking agents             | <chem>CC(C)NCC(COC1=CC=C(C=C1)C(COC)O</chem>                                            |
| Propranolol | DB00571      | Beta blocking agents             | <chem>CC(C)NCC(COC1=CC=CC2=CC=CC=C21)O</chem>                                           |
| Timolol     | DB00373      | Beta blocking agents             | <chem>CC(C)(C)NCC(COC1=NSN=C1N2CCOCC2)O</chem>                                          |
| Amlodipine  | DB00381      | Calcium channel blockers         | <chem>CCOC(=O)C1=C(NC(=C(C1C2=C C=CC=C2Cl)C(=O)OC)C)COCCN</chem>                        |
| Bepidil     | DB01244      | Calcium channel blockers         | <chem>CC(C)COCC(CN(CC1=CC=CC=C1)C2=CC=CC=C2)N3CCCC3</chem>                              |
| Diltiazem   | DB00343      | Calcium channel blockers         | <chem>CC(=O)OC1C(SC2=CC=CC=C2N(C1=O)CCN(C)C)C3=CC=C(C=C3)OC</chem>                      |
| Felodipine  | DB01023      | Calcium channel blockers         | <chem>CCOC(=O)C1=C(NC(=C(C1C2=C(C=CC=C2)Cl)Cl)C(=O)OC)C</chem>                          |

| Drug Name              | Drug Bank ID | MoAs for CHD                           |           | SMILE                                                                                        |
|------------------------|--------------|----------------------------------------|-----------|----------------------------------------------------------------------------------------------|
| Nicardipine            | DB00622      | Calcium blockers                       | channel   | <chem>CC1=C(C(C(=C(N1)C)C(=O)OCCN(C)CC2=CC=CC=C2)C3=CC(=C=C=C3)[N+](=O)[O-])C(=O)OC</chem>   |
| Nifedipine             | DB01115      | Calcium blockers                       | channel   | <chem>CC1=C(C(C(=C(N1)C)C(=O)OC)C2=CC=CC=C2[N+](=O)[O-])C(=O)OC</chem>                       |
| Nisoldipine            | DB00401      | Calcium blockers                       | channel   | <chem>CC1=C(C(C(=C(N1)C)C(=O)OCC(C)C)C2=CC=CC=C2[N+](=O)[O-])C(=O)OC</chem>                  |
| Verapamil              | DB00661      | Calcium blockers                       | channel   | <chem>CC(C)C(CCCN(C)CCC1=CC(=C(C=C1)OC)OC)(C#N)C2=CC(=C(C=C2)OC)OC</chem>                    |
| Dihydropyridine        | NA           | Calcium blockers                       | channel   | <chem>C1C=CC=CN1</chem>                                                                      |
| Nitroglycerin          | DB00727      | Dilated artery                         | coronary  | <chem>C(C(CO[N+](=O)[O-])O[N+](=O)[O-])O[N+](=O)[O-]</chem>                                  |
| Isosorbide mononitrate | DB01020      | Dilated artery                         | coronary  | <chem>C1C(C2C(O1)C(CO2)O[N+](=O)[O-])O</chem>                                                |
| Isosorbide dinitrate   | DB00883      | Dilated artery                         | coronary  | <chem>C1C(C2C(O1)C(CO2)O[N+](=O)[O-])O[N+](=O)[O-]</chem>                                    |
| Atorvastatin           | DB01076      | Lipid agents                           | modifying | <chem>CC(C)C1=C(C(=C(N1CCC(CC(C(=O)O)O)O)C2=CC=C(C=C2)F)C3=CC=CC=C3)C(=O)NC4=CC=CC=C4</chem> |
| Rosuvastatin           | DB01098      | Lipid agents                           | modifying | <chem>CC(C)C1=NC(=NC(=C1C=CC(CC(CC(=O)O)O)O)C2=CC=C(C=C2)F)N(C)S(=O)(=O)C</chem>             |
| Spirolactone           | DB00421      | Mineralocorticoid receptor antagonist  |           | <chem>CC(=O)SC1CC2=CC(=O)CCC2(C3C1C4CCC5(C4(CC3)C)CCC(=O)O5)C</chem>                         |
| Eplerenone             | DB00700      | Mineralocorticoid receptor antagonists |           | <chem>CC12CCC(=O)C=C1CC(C3C24C(O4)CC5(C3CCC56CCC(=O)O6)C)C(=O)OC</chem>                      |
| Dapagliflozin          | DB06292      | SGLT2 inhibitor                        |           | <chem>CCOC1=CC=C(C=C1)CC2=C(C=CC(=C2)C3C(C(C(C(O3)CO)O)O)O)C1</chem>                         |
| Empagliflozin          | DB09038      | SGLT2 inhibitor                        |           | <chem>C1COCC1OC2=CC=C(C=C2)CC3=C(C=CC(=C3)C4C(C(C(C(O4)CO)O)O)O)C1</chem>                    |
| Canagliflozin          | DB08907      | SGLT2 inhibitor                        |           | <chem>CC1=C(C=C(C=C1)C2C(C(C(C(O2)CO)O)O)O)CC3=CC=C(S3)C4=CC=C(C=C4)F</chem>                 |

**Table S6** The information of 22 CDDP components including the bioactive equivalent components and the components detectable in patients' blood.

| Component                      | Class                          | SMILE                                                                                                                                    |
|--------------------------------|--------------------------------|------------------------------------------------------------------------------------------------------------------------------------------|
| Cryptotanshinone               | Bioactive Equivalent Component | <chem>CC1COC2=C1C(=O)C(=O)C3=C2C=CC4=C3CCCC4(C)C</chem>                                                                                  |
| Dihydrotanshinone I            | Bioactive Equivalent Component | <chem>CC1COC2=C1C(=O)C(=O)C3=C2C=CC4=C3C=CC=C4C</chem>                                                                                   |
| Ginsenoside-Rd                 | Bioactive Equivalent Component | <chem>CC(=CCCC(C)(C1CCC2(C1C(CC3C2(CCC4C3(CCC(C4(C)C)OC5C(C(C(C(O5)CO)O)O)OC6C(C(C(C(O6)C(O)O)O)C)C)O)C)OC7C(C(C(C(O7)CO)O)O)O)C</chem>  |
| Ginsenoside-Rh <sup>1</sup>    | Bioactive Equivalent Component | <chem>CC(=CCCC(C)(C1CCC2(C1C(CC3C2(CC(C4C3(CCC(C4(C)C)O)C)OC5C(C(C(C(O5)CO)O)O)O)C)O)C)O)C</chem>                                        |
| Lithospermic acid              | Bioactive Equivalent Component | <chem>C1=CC(=C(C=C1CC(C(=O)O)OC(=O)C=CC2=C3C(C(OC3=C(C=C2)O)C4=CC(=C(C=C4)O)O)C(=O)O)O)O</chem>                                          |
| Rosmarinic acid                | Bioactive Equivalent Component | <chem>C1=CC(=C(C=C1CC(C(=O)O)OC(=O)C=CC2=CC(=C(C=C2)O)O)O)O</chem>                                                                       |
| Salvianolic acid A             | Bioactive Equivalent Component | <chem>C1=CC(=C(C=C1CC(C(=O)O)OC(=O)C=CC2=C(C(=C(C=C2)O)O)C=C3=CC(=C(C=C3)O)O)O)O</chem>                                                  |
| Salvianolic acid B             | Bioactive Equivalent Component | <chem>C1=CC(=C(C=C1CC(C(=O)O)OC(=O)C=CC2=C3C(C(OC3=C(C=C2)O)C4=CC(=C(C=C4)O)O)C(=O)OC(C5=CC(=C(C=C5)O)O)C(=O)O)O)O</chem>                |
| Salvianolic acid D             | Bioactive Equivalent Component | <chem>C1=CC(=C(C=C1CC(C(=O)O)OC(=O)C=CC2=C(C(=C(C=C2)O)O)CC(=O)O)O)O</chem>                                                              |
| Salvianolic acid G             | Bioactive Equivalent Component | <chem>C1=CC(=C(C=C1CC(C(=O)O)OC(=O)C=CC2=C(C(=C(C=C2)O)O)CC(=O)O)O)O</chem>                                                              |
| Tanshinone I                   | Bioactive Equivalent Component | <chem>CC1=CC=CC2=C1C=CC3=C2C(=O)C(=O)C4=C3OC=C4C</chem>                                                                                  |
| Tanshinone IIA                 | Bioactive Equivalent Component | <chem>CC1=COC2=C1C(=O)C(=O)C3=C2C=CC4=C3CCCC4(C)C</chem>                                                                                 |
| Borneol                        | Blood Component <sup>1</sup>   | <chem>CC1(C2CCC1(C(C2)O)C)C</chem>                                                                                                       |
| Caffeic acid                   | Blood Component <sup>1</sup>   | <chem>C1=CC(=C(C=C1C=CC(=O)O)O)O</chem>                                                                                                  |
| Isoborneol                     | Blood Component <sup>1</sup>   | <chem>CC1(C2CCC1(C(C2)O)C)C</chem>                                                                                                       |
| Notoginsenoside R <sup>1</sup> | Blood Component <sup>1</sup>   | <chem>CC(=CCCC(C)(C1CCC2(C1C(CC3C2(CC(C4C3(CCC(C4(C)C)O)C)OC5C(C(C(C(O5)CO)O)O)OC6C(C(C(C(O6)O)O)O)C)O)C)OC7C(C(C(C(O7)CO)O)O)O)C</chem> |
| Protocatechuic acid            | Blood Component <sup>1</sup>   | <chem>C1=CC(=C(C=C1C(=O)O)O)O</chem>                                                                                                     |
| Tanshinone IIB                 | Blood Component <sup>1</sup>   | <chem>CC1=COC2=C1C(=O)C(=O)C3=C2C=CC4=C3CCCC4(C)CO</chem>                                                                                |
| Danshensu                      | Both <sup>2</sup>              | <chem>C1=CC(=C(C=C1CC(C(=O)O)O)O)O</chem>                                                                                                |
| Ginsenoside-Rb <sup>1</sup>    | Both <sup>2</sup>              | <chem>CC(=CCCC(C)(C1CCC2(C1C(CC3C2(CCC4C3(CCC(C4(C)C)OC5C(C(C(C(O5)CO)O)O)OC6C(C(C(C(O6)C</chem>                                         |

| Component                   | Class             | SMILE                                                                                                                  |
|-----------------------------|-------------------|------------------------------------------------------------------------------------------------------------------------|
|                             |                   | <chem>O)O)O)O)C)C)O)C)OC7C(C(C(C(O7)COC8C(C(C(C(O8)CO)O)O)O)O)O)O)C</chem>                                             |
| Ginsenoside-Rg <sup>1</sup> | Both <sup>2</sup> | <chem>CC(=CCCC(C)(C1CCC2(C1C(CC3C2(CC(C4C3(CCC(C4(C)C)O)C)OC5C(C(C(C(O5)CO)O)O)O)C)O)C)OC6C(C(C(C(O6)CO)O)O)O)C</chem> |
| Protocatechuic aldehyde     | Both <sup>2</sup> | <chem>C1=CC(=C(C=C1C=O)O)O</chem>                                                                                      |

<sup>1</sup>represent the CDDP components which are detectable in patients' blood after CDDP administration.

<sup>2</sup>represent the CDDP components which are bioactive equivalent component and detectable in patients' blood after CDDP administration.

### 3.Supporting figures

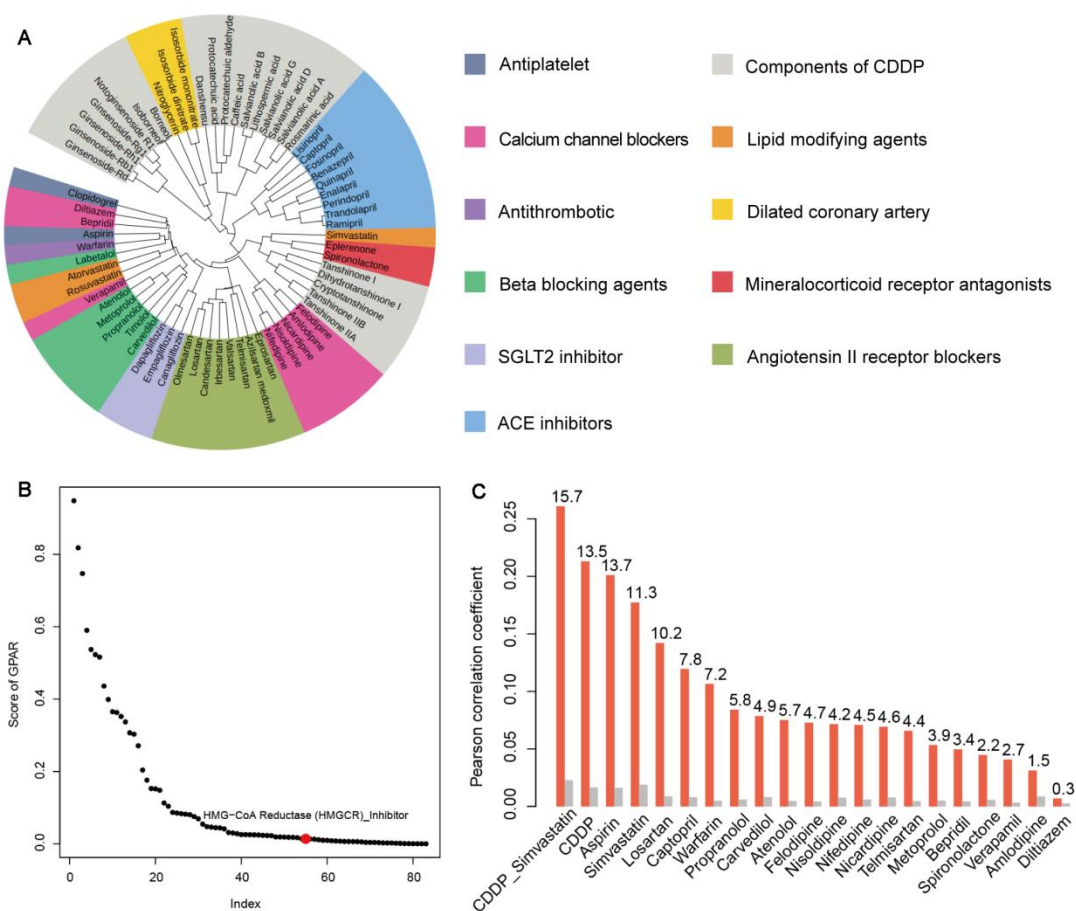

**Figure S1** Identification of the pharmacological mechanisms of CDDP on CHD through computational systematic pharmacology. (A) Based on the similarity of chemical structure, the unsupervised hierarchical clustering of the CDDP components and FDA-approved drugs for CHD treatment was performed. Ten types of different mechanisms of action (MoAs) of drugs were highlighted by different colors, and CDDP components were marked by grey color. (B) Prediction of MoAs for CDDP using GPAR platform based on CDDP-regulated gene expression profiles. (C) Correlation between CDDP and FDA-approved drugs for CHD treatment was determined by calculating the Pearson correlation coefficient between targets of CDDP and FDA-approved drugs for CHD treatment and genes related to CHD. CDDP\_Simvastatin represents the union of targets between CDDP and simvastatin. The significance of correlation was evaluated by calculation of z-score and labeled on the top of each bar. CHD: coronary heart disease; GPAR: Genetic Profileactivity Relationship.

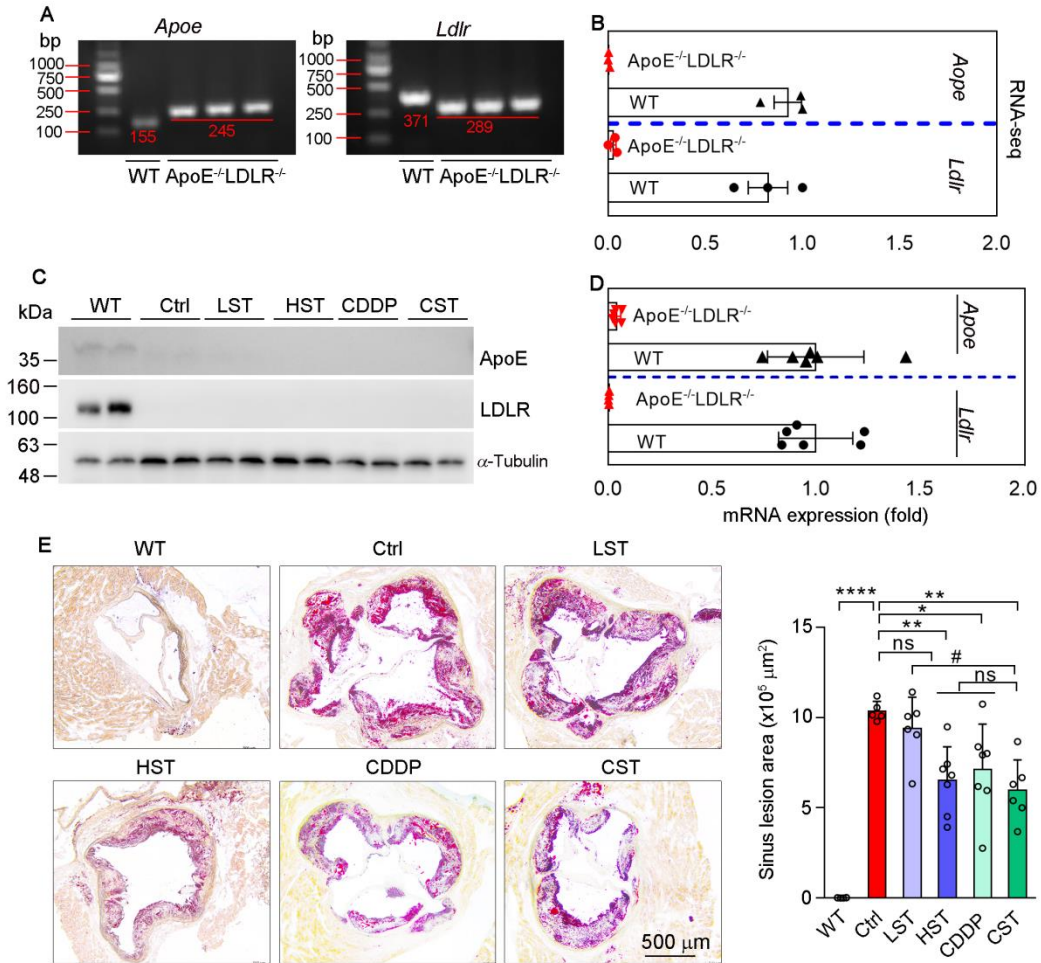

**Figure S2** CDDP reduces HFD-induced atherosclerosis in ApoE<sup>-/-</sup>LDLR<sup>-/-</sup> mice. (A) The genotype of ApoE<sup>-/-</sup>LDLR<sup>-/-</sup> mouse was confirmed by PCR genotyping of tail DNA. (B) Expressions of ApoE and LDLR in WT and ApoE<sup>-/-</sup>LDLR<sup>-/-</sup> mice were determined by RNA-seq with mouse heart samples (3/group). (C, D) Expressions of ApoE and LDLR protein or mRNA in heart samples were determined by Western blot or qRT-PCR (4–5/group). (E) Aortic root cross sections prepared from mice in Fig. 1 were conducted oil red O staining with quantitative analysis of lesion area ( $n = 5–7$ ). The data are shown as the mean  $\pm$  SEM. \* $P < 0.05$ , \*\* $P < 0.01$ , \*\*\*\* $P < 0.0001$ ; # $P < 0.05$ , ns: not significant between indicated groups.



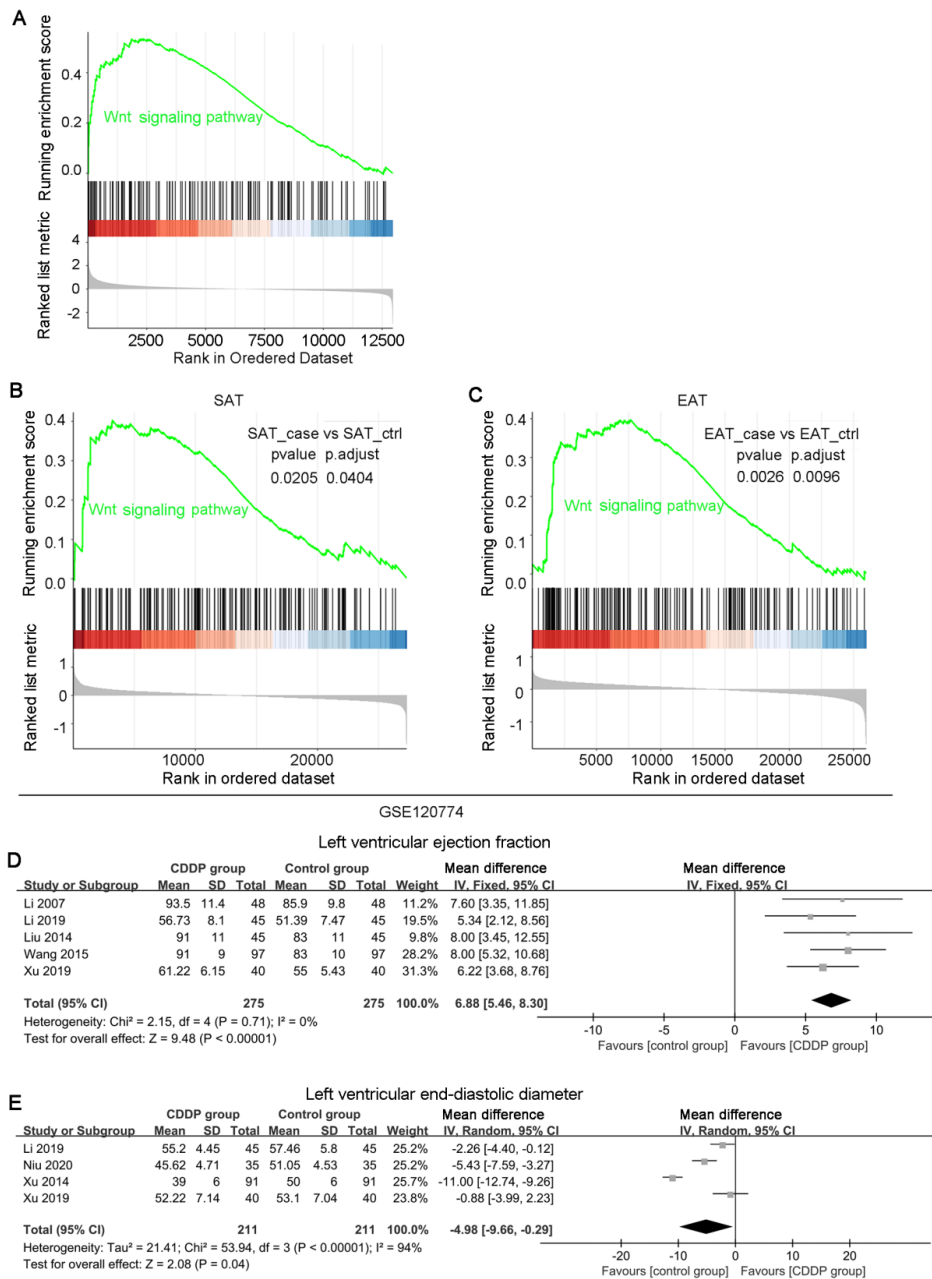

**Figure S3** Protection against myocardial damage by CDDP is related to inactivating Wnt pathway in mice and CHD patients. GSEA analysis shows significant positive enrichment of Wnt signaling pathway gene set in expression profiles for HFD-fed ApoE<sup>-/-</sup>LDLR<sup>-/-</sup> mice or CHD patients. (A) HFD-fed ApoE<sup>-/-</sup>LDLR<sup>-/-</sup> mouse heart tissue; (B, C) Subcutaneous adipose tissue (SAT) from a site adjacent to the right coronary artery and epicardial adipose tissue (EAT) of CHD patients. (D, E) Meta-analysis of left ventricular ejection fraction, left ventricular end diastolic diameter of CHD patients receiving co-treatment of CDDP and statins. CHD: coronary heart disease; GSEA: gene set enrichment analysis.

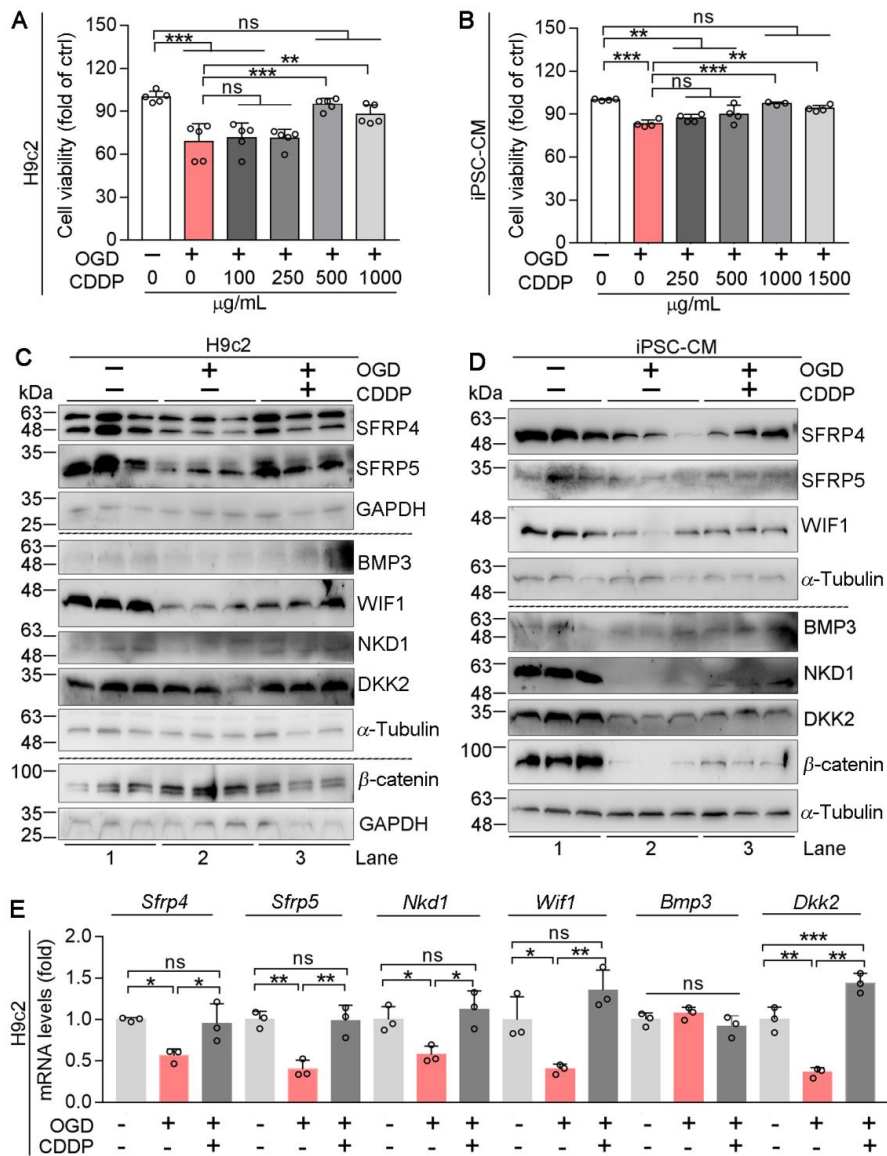

**Figure S4** CDDP protects cardiomyocytes against OGD-induced damage by regulating Wnt pathway. H9c2 or iPSC-CM cells were cultured in normal condition (Ctrl), OGD condition (in a tank filled with a gas mixture of 95% N<sub>2</sub> plus 5% CO<sub>2</sub> at 37 °C and in serum-free medium lacking glucose) or OGD plus CDDP treatment at the indicated concentrations (A, B: CDDP at 500  $\mu\text{g/mL}$  for H9c2 and 1000  $\mu\text{g/mL}$  for iPSC-CM) for 12 h. After treatment, cells were used to conduct the following assays: cell viability by an assay kit (A, B:  $n = 4-5$ ); expressions of Wnt-related proteins (BMP3, WIF1, SFRP4/5, NKD1, DKK2 and  $\beta$ -catenin) by Western blot (C, D:  $n = 3$ ); and expressions of *Sfrp4/5*, *Nkd1*, *Wif1*, *Bmp3* and *Dkk2* mRNA in H9c2 cells by qRT-PCR (E:  $n = 3$ ). The data are shown as the mean  $\pm$  SEM. \* $P < 0.05$ , \*\* $P < 0.01$ , \*\*\* $P < 0.001$ , ns: not significantly different between indicated groups.

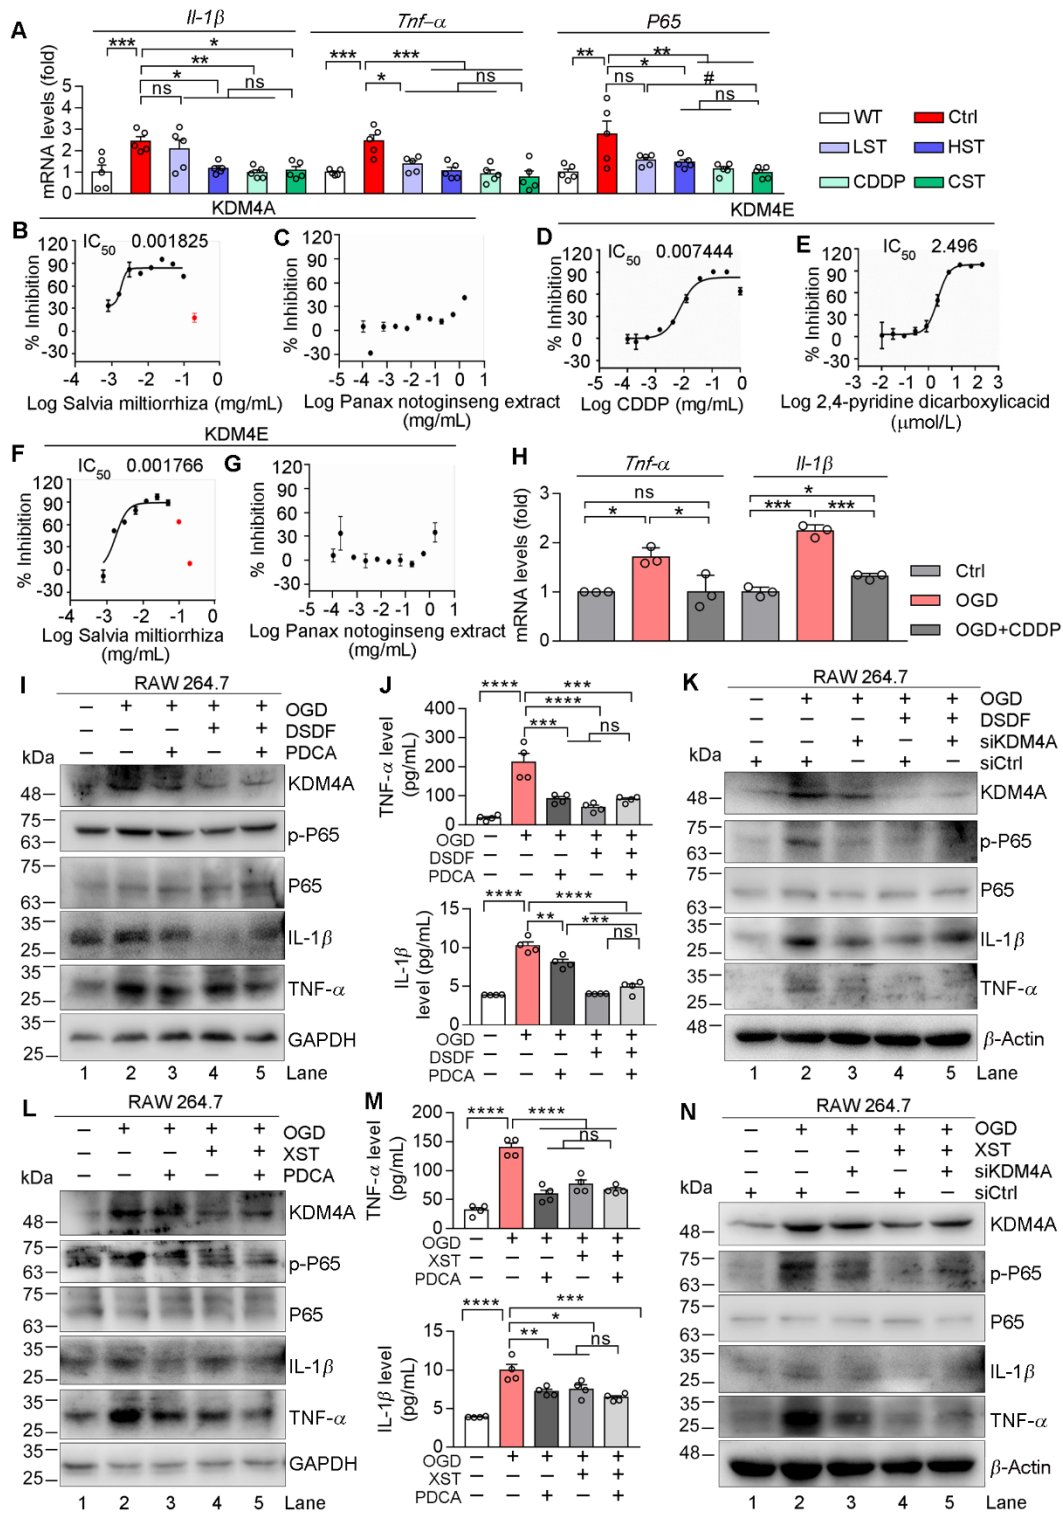

**Figure S5** CDDP and CDDP components reduce inflammation by inhibiting KDM4A expression in OGD-induced cells or HFD-fed ApoE<sup>-/-</sup>LDLR<sup>-/-</sup> mouse heart. (A) Expression of *Il-1β*, *Tnf-α* and *P65* mRNA in mouse heart was determined by qRT-PCR ( $n = 5$ ). Inhibition of KDM4A (B, C) or KDM4E (D, F, G) activity by CDDP components was determined by an *in vitro* enzymatic activity assay system with PDCA

(a KDM4A chemical inhibitor) as a positive control (E). (H–N) H9c2 or RAW 264.7 cells were cultured in normal condition, OGD condition or OGD condition plus treatment of CDDP (500  $\mu\text{g}/\text{mL}$ ), DSDF (250  $\mu\text{g}/\text{mL}$ ), XST (500  $\mu\text{g}/\text{mL}$ ) or PDCA (1  $\mu\text{mol}/\text{L}$ ) as indicated for 12 h. After treatment, cells or treatment medium were used to conduct the following assays: mRNA expression of *Il-1 $\beta$* , *Tnf- $\alpha$*  in H9c2 cells by qRT-PCR (H:  $n = 3$ ); expression of KDM4A, P65, p-P65, IL-1 $\beta$  and TNF- $\alpha$  protein in RAW 264.7 cells by Western blot (I, K, L, N,  $n = 3$ ); the levels of TNF- $\alpha$  and IL-1 $\beta$  in treatment medium collected from cells in Fig. S5I or S5L by ELISA assay kits (J or M,  $n = 4$ ). The data are shown as the mean  $\pm$  SEM. \* $P < 0.05$ , \*\* $P < 0.01$ , \*\*\* $P < 0.001$ , ns: not significantly different between indicated groups.

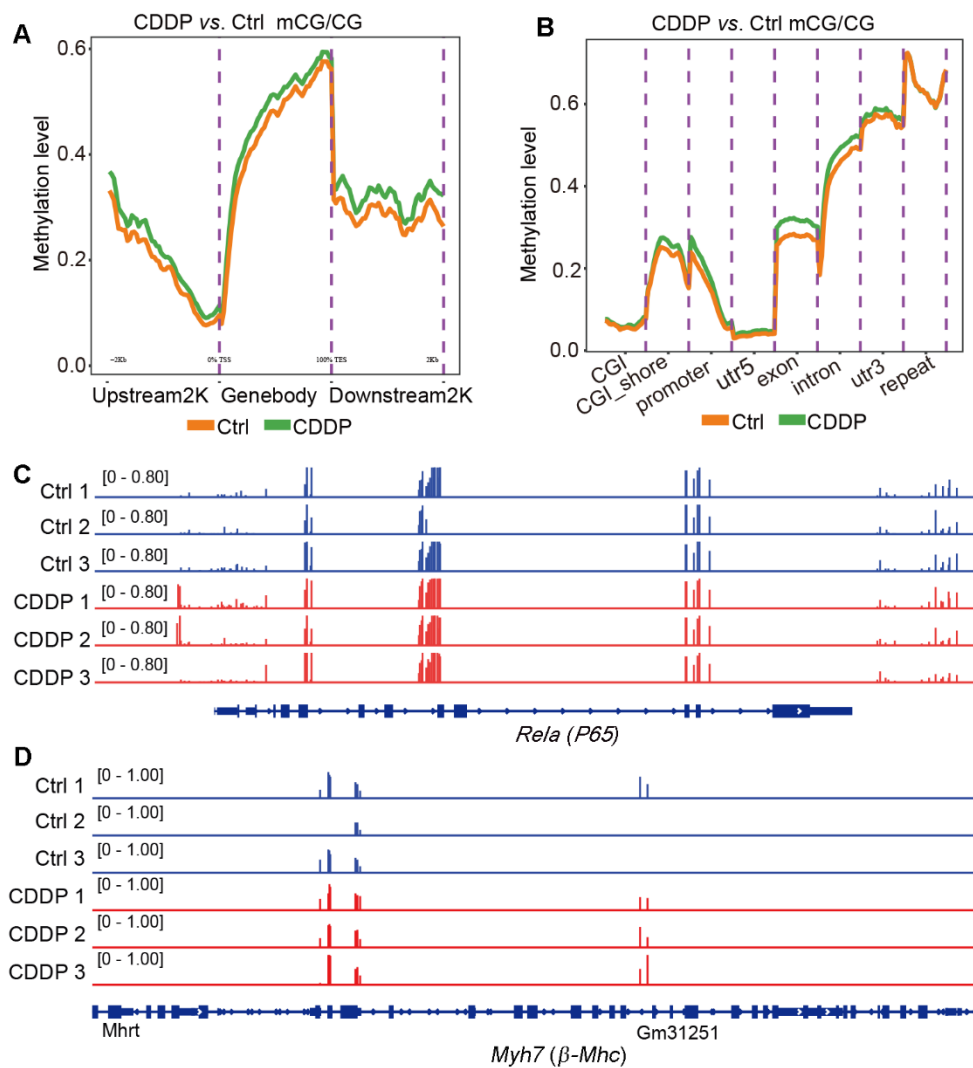

**Figure S6** CDDP affects DNA methylation in mouse heart. At the end of experiment as indicated in Fig. 1A, mouse hearts were collected and used for DNA methylation sequencing ( $n = 3$ ). (A, B) The characteristic of DNA methylation on a variety of annotated genomic regions. (C, D) Integrative Genomics Viewer (IGV) tracks displaying the characteristic of methylation for *Rela (P65)* and *Myh7 (β-Mhc)* gene in the two groups, each was done in triplicate. Ctrl: HFD-fed ApoE<sup>-/-</sup>LDLR<sup>-/-</sup> mice; CDDP: HFD-fed ApoE<sup>-/-</sup>LDLR<sup>-/-</sup> mice received CDDP treatment.

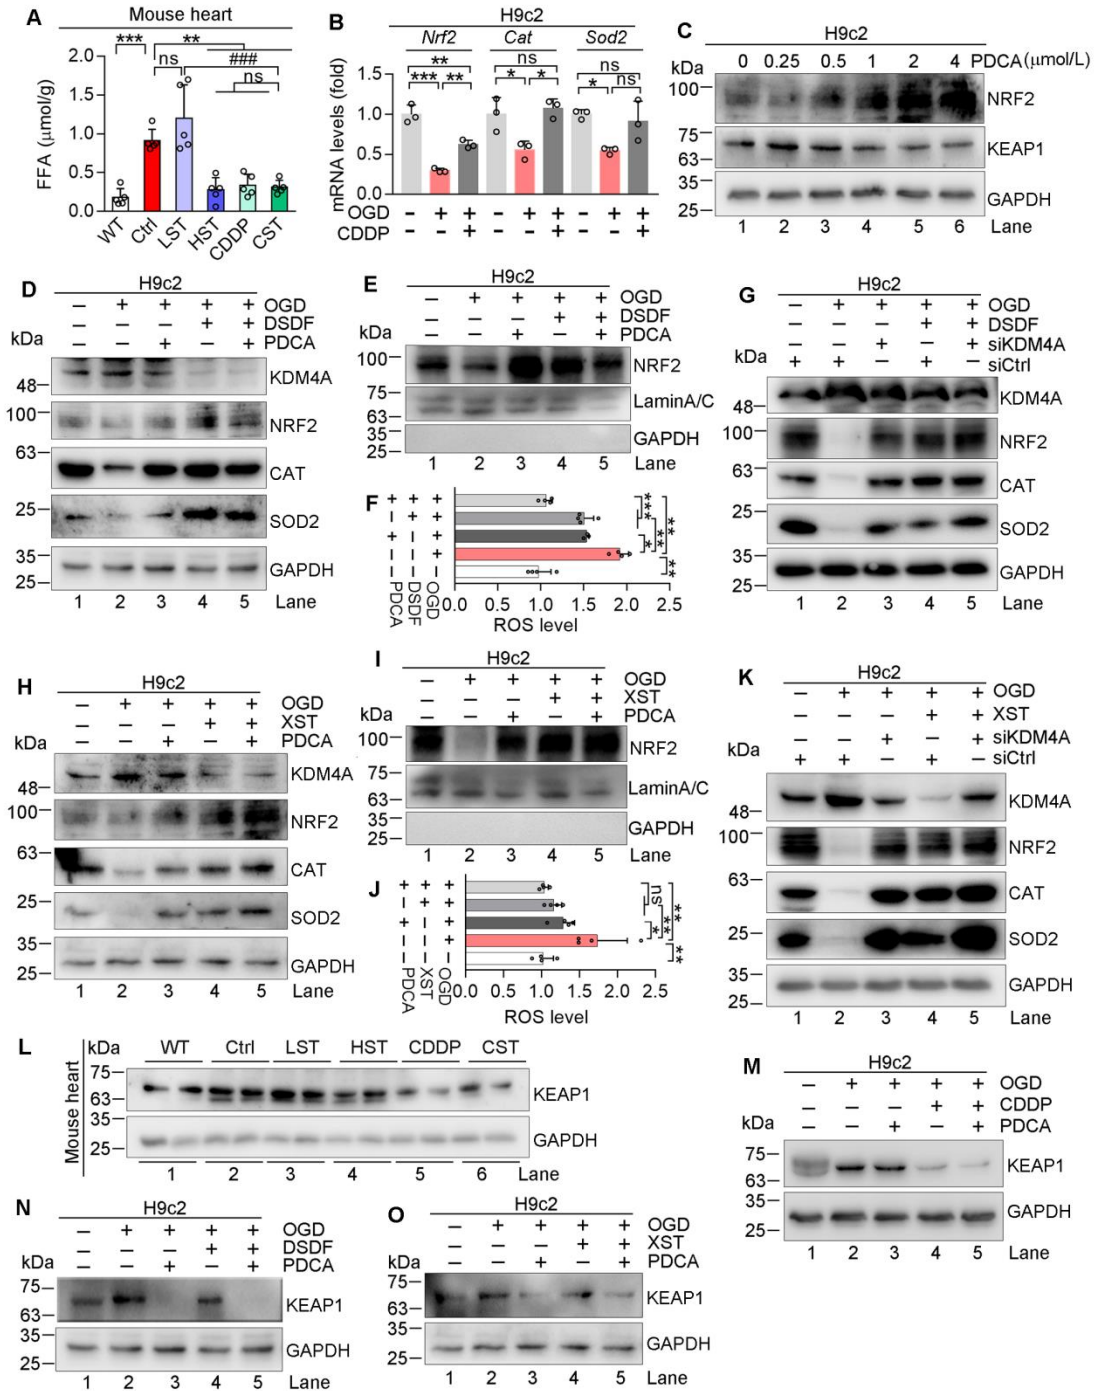

**Figure S7** CDDP protects cardiomyocytes against OGD-induced damage by anti-oxidative stress. (A, L) FFA levels and KEAP1 expression in mouse heart were determined by the FFA assay kit ( $n = 5$ ) and Western blot, respectively. (C) H9c2 cells cultured in normal condition were treated with PDCA at the indicated concentrations for 12 h; (B, D–K, M–O) H9c2 cells cultured in normal condition, OGD condition, OGD condition plus treatment of CDDP (500  $\mu\text{g/mL}$ ), DSDF (250  $\mu\text{g/mL}$ ), XST (500  $\mu\text{g/mL}$ ) and PDCA (1  $\mu\text{mol/L}$ ), or OGD condition plus siCtrl/siKDM4A transfection



and DSDF or XST treatment as indicated for 12 h. After treatment, cells were used to conduct following assays: expression of *Nrf2*, *Cat* and *Sod2* mRNA by qRT-PCR (B:  $n = 3$ ); expressions of NRF2, KEAP1, KDM4A, CAT and SOD2 protein in whole cellular extract (C, D, G, H, K, M–O) and NRF2 protein in nuclear extract (E, I) by Western blot ( $n = 3$ ); ROS levels in cells in Fig. S7E and S7I by assay kits (F, J,  $n = 4$ ). The data are shown as the mean  $\pm$  SEM.  $*P < 0.05$ ,  $**P < 0.01$ ,  $***P < 0.001$ ;  $###P < 0.001$ , ns: not significantly different between indicated groups. FFA: free fatty acid; ROS: reactive oxygen species.

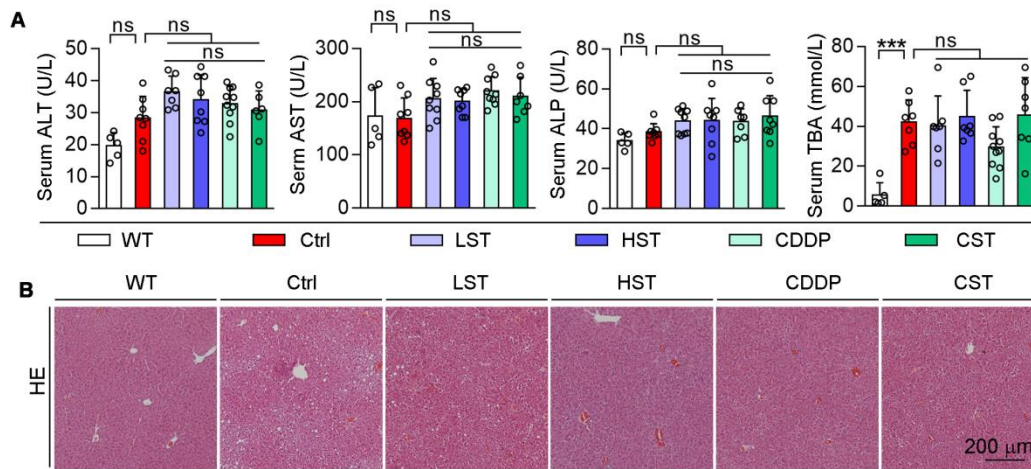

**Figure S8** CDDP has no side effect on mouse liver. At the end of the 16-week treatment indicated in Fig. 1A, mouse serum and liver samples were used to conduct the following assays. (A) Levels of serum AST, ALT, ALP and TBA by assay kits ( $n = 5-8$ ); (B) HE staining of mouse liver sections. The data are shown as the mean  $\pm$  SEM.  $***P < 0.001$ , ns, not significantly different between indicated groups. AST: Aspartate transaminase; ALT: Alanine aminotransferase; ALP: Alkaline phosphatase; TBA: total bile acid.

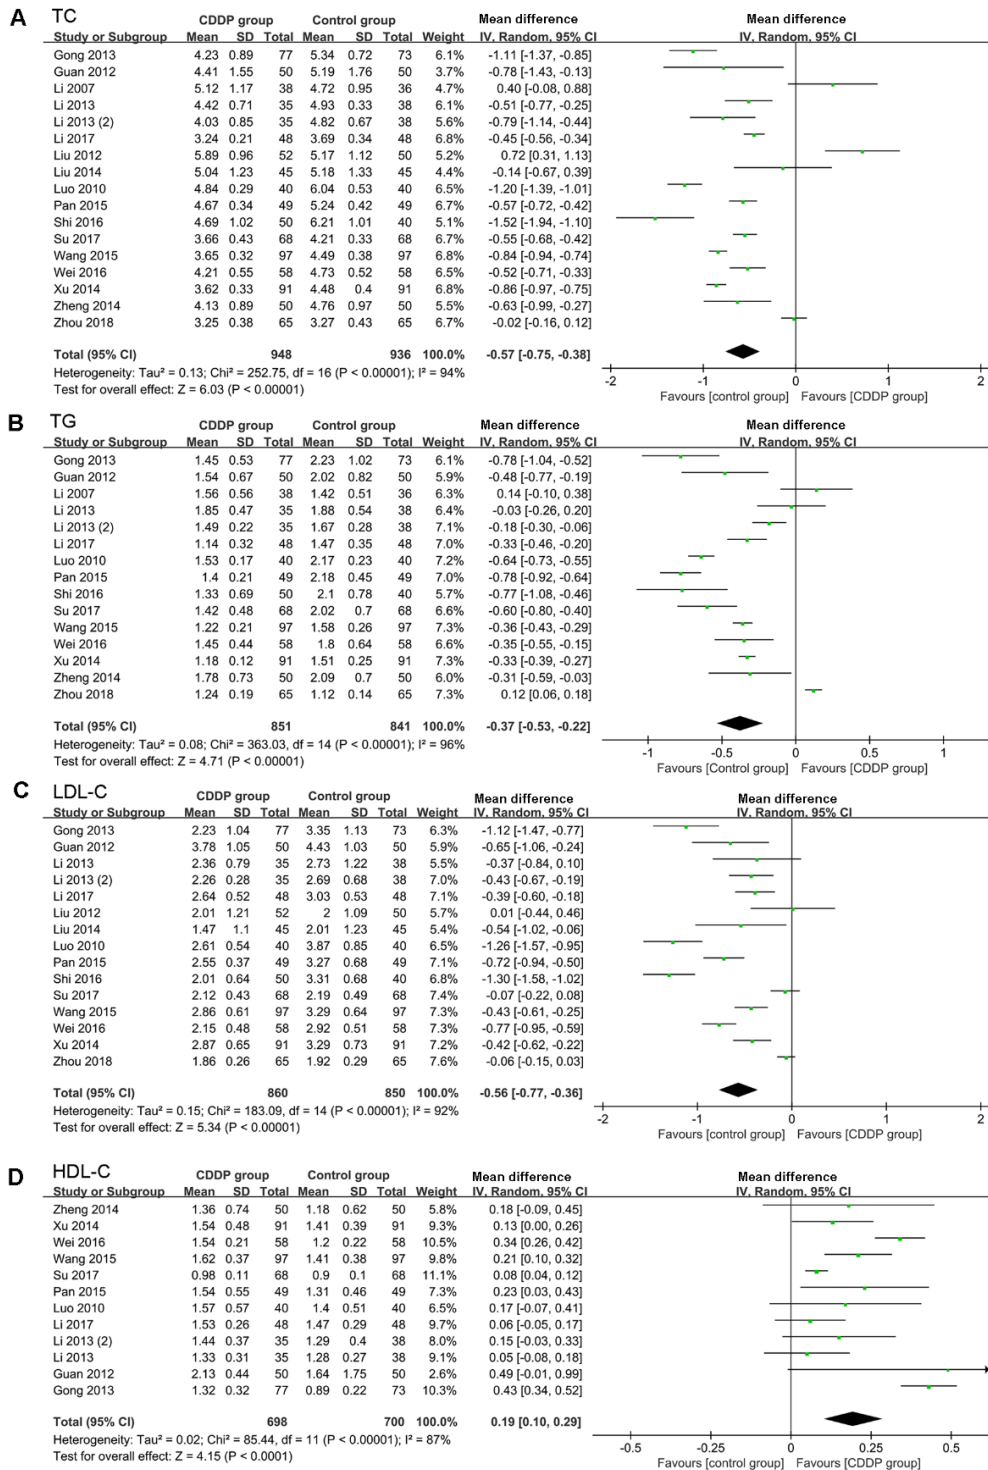

**Figure S9** CDDP combined statins improves dyslipidemia better than statins alone in CHD patients. Meta-analysis of lipid profiles (TC, TG, LDL-C and HDL-C) of blood samples collected from CHD patients with treatment of CDDP combined statins (CDDP group) or statins alone (Control group). CHD: coronary heart disease; HDL-C: high-density lipoprotein cholesterol; LDL-C: low-density lipoprotein cholesterol; TC: total cholesterol; TG: triglyceride.
